# Supplementary material for: Biofuels from Pyrolysis of Third-Generation Biomass from Household and Garden Waste Composting Bin: Kinetics Analysis
Source: MDPI journal article supplement (doi:10.3390/reactions4020018), 2023-06-12
Supplement: s1 [file s1]

Supplementary data section

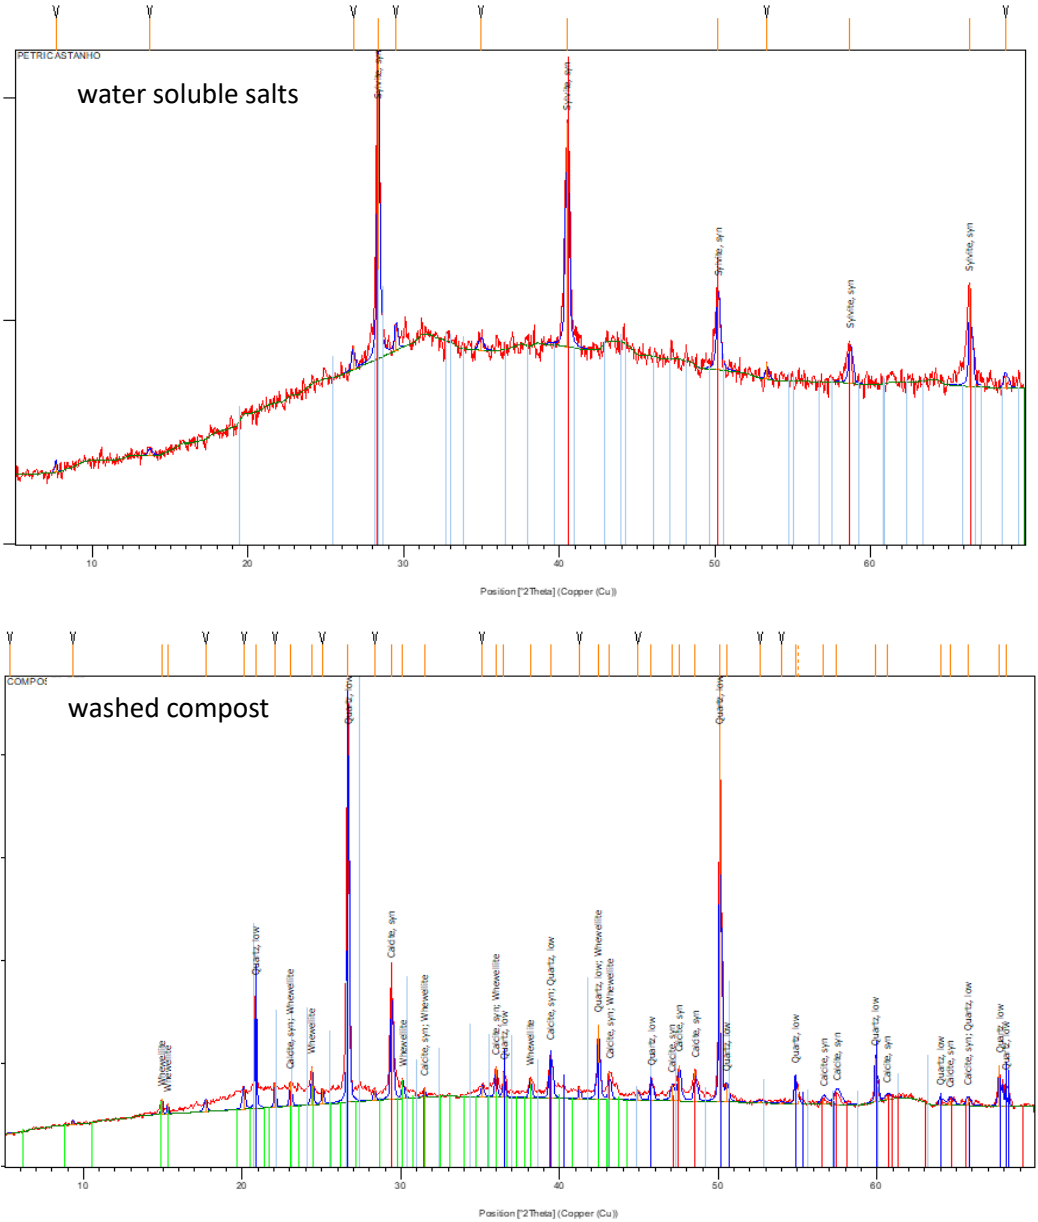



|      |                            |
|------|----------------------------|
| 1375 | C-H deformation            |
| 1428 | CH <sub>2</sub> scissoring |

**Table S2** – FTIR bands attribution for humic and fulvic substances in soils (adapted from [25]).

| Wavenumber (cm <sup>-1</sup> ) | Attribution                                                                    |
|--------------------------------|--------------------------------------------------------------------------------|
| 3700-3620                      | Free OH stretch                                                                |
| 3400-3200                      | OH stretch; intra and inter molecular N-H; amine NH and phenol OH              |
| 1660-1630                      | Amide C=O stretch; quinone C=O/or C=O to H in paired ketones; C=C aromatic     |
| 1600-1580                      | C=C aromatic group stretching                                                  |
| 1430                           | Stretching of methyl and methylene C-H bonds                                   |
| 1400-1380                      | Aliphatic C-H stretch                                                          |
| <1000                          | C-O stretches; aromatic C-H corresponding to polysaccharides and carbohydrates |

## References

- [25] Machado W, Franchini JC, de Fátima Guimarães M, Filho JT. Spectroscopic characterization of humic and fulvic acids in soil aggregates, Brazil. *Heliyon* 2020;6:e04078. <https://doi.org/10.1016/J.HELİYON.2020.E04078>.
- [40] Kurian JK, Gariepy Y, Orsat V, Raghavan GSV. Microwave-assisted lime treatment and recovery of lignin from hydrothermally treated sweet sorghum bagasse. *Biofuels* 2015;6:341–55. <https://doi.org/10.1080/17597269.2015.1110775>.
